# Supplementary material for: Long read whole genome sequencing-based discovery of complex structural variants and their role in aetiology of non-syndromic autism spectrum disorder in India
Source: Research Square preprint supplement (doi:10.21203/rs.3.rs-5950423/v1), 2025-02-05
Supplement: Supplementary file 1 [file 14bef36ad715f563f8c1f42d.docx]

**Supplementary File 5:** Steps used for filtering and prioritization of SVs

| **Case ID** | **Number of calls Merged total** | Number of calls_Merged total_SV type | | | | | Number of calls_after Filter column | | | | | Number of calls_after Qual column | | | | | Number of calls_after ENCODE_blacklist_characteristics_left and right columns | | | | | Number of calls_after Gene_count column | | | | | Number of calls_after B_variant_AFmax (column B_gain_AFmax; B_loss_AFmax; B_ins_AFmax; B_inv_AFmax) | | | | | Number of calls_after ExAC_del/dupZ (columns ExAC_delZ; ExAC_dupZ) | | | | | Number of calls_after ACMG_class column | | | | | Number of calls_after ALT column | | | | |
| --- | --- | --- | --- | --- | --- | --- | --- | --- | --- | --- | --- | --- | --- | --- | --- | --- | --- | --- | --- | --- | --- | --- | --- | --- | --- | --- | --- | --- | --- | --- | --- | --- | --- | --- | --- | --- | --- | --- | --- | --- | --- | --- | --- | --- | --- | --- |
| **Total number of SVs called by all 5 callers** | Number of calls segregated based on SV type here onwards | | | | | To only use variants from VCF input files that passed all filters during the calling (FILTER column value equal to PASS) | | | | | To only use variants from VCF input files that have at least 99% of being accurately called A quality score of 20 indicates 99% accuracy with an error of 1% | | | | | The removal of the ENCODE blacklist is an essential quality measure when analyzing functional genomics data. The human ENCODE blacklist is a comprehensive set of regions that have anomalous, unstructured, or high signal in next-generation sequencing experiments. | | | | | Number of overlapped genes with the SV | | | | | Maximum allele frequency of the reported benign gain genomic regions (if available) A SV completely contained within an established benign CNV region would be classified as benign (if sharing the same SV type) | | | | | Higher positive values indicate greater intolerance (a lower than expected rate of CNVs for that gene). | | | | | SVs are ranked according to ACMG classification from 1 to 5, i.e., from benign to pathogenic, respectively | | | | |  | | | | |
| deselect ref; hom_ref & not_fully_covered | | | | | greater than or equals 20 or equals "." for NanoVar variants: ≥ 1 | | | | | Select only blanks | | | | | Deselect 0 | | | | | less than or equal to 0.01 OR equals "blank" | | | | | greater than or equal to 0 OR equals "blank" | | | | | Deselect class 1 and 2 | | | | | does not contain chrUn (specific to translocations) | | | | |
|  |  | del | dup | ins | inv | tra | del | dup | ins | inv | tra | del | dup | ins | inv | tra | del | dup | ins | inv | tra | del | dup | ins | inv | tra | del | dup | ins | inv | tra | del | dup | ins | inv | tra | del | dup | ins | inv | tra | del | dup | ins | inv | tra |
| ASD-063 | 64319 | 25312 | 839 | 31749 | 192 | 6227 | 25202 | 807 | 31657 | 191 | 6227 | 9669 | 251 | 13255 | 98 | 762 | 8578 | 213 | 12217 | 88 | 696 | 4539 | 115 | 6579 | 54 | 383 | 2120 | 87 | 5401 | 15 | NA | 1512 | 50 | NA | NA | NA | 1054 | 49 | NA | NA | NA | NA | NA | NA | NA | 305 |
| ASD-096 | 91536 | 35900 | 2479 | 37224 | 412 | 15521 | 35771 | 2479 | 37224 | 408 | 15521 | 12064 | 262 | 15240 | 170 | 1599 | 10963 | 218 | 14157 | 156 | 1517 | 5952 | 128 | 7771 | 99 | 841 | 2825 | 89 | 6293 | 22 | NA | 1963 | 57 | NA | NA | NA | 1318 | 56 | NA | NA | NA | NA | NA | NA | NA | 689 |
| ASD-090 | 136836 | 38866 | 2461 | 38378 | 1026 | 56105 | 38624 | 2377 | 38166 | 1024 | 56105 | 13703 | 415 | 16939 | 149 | 3572 | 12351 | 346 | 15826 | 136 | 3448 | 6774 | 213 | 8801 | 107 | 1988 | 3231 | 166 | 7208 | 47 | NA | 2271 | 100 | NA | NA | NA | 1600 | 98 | NA | NA | NA | NA | NA | NA | NA | 1786 |
| ASD-023 | 268573 | 51894 | 1834 | 183341 | 762 | 30742 | 51569 | 1776 | 182999 | 754 | 30742 | 16362 | 409 | 26247 | 262 | 1996 | 14530 | 286 | 24447 | 241 | 1793 | 7864 | 167 | 13450 | 149 | 939 | 3518 | 133 | 11365 | 41 | NA | 2554 | 86 | NA | NA | NA | 1742 | 86 | NA | NA | NA | NA | NA | NA | NA | 775 |
| ASD-083 | 309956 | 38845 | 1644 | 208461 | 1079 | 59927 | 38656 | 1602 | 208285 | 1077 | 59927 | 11595 | 313 | 18993 | 218 | 2871 | 10375 | 229 | 17764 | 201 | 2754 | 5663 | 148 | 9737 | 131 | 1537 | 2550 | 115 | 8282 | 54 | NA | 1835 | 76 | NA | NA | NA | 1316 | 75 | NA | NA | NA | NA | NA | NA | NA | 1384 |
| ASD-042 | 218072 | 42018 | 4042 | 52104 | 1803 | 118105 | 41728 | 3993 | 51812 | 1798 | 118105 | 15238 | 484 | 20071 | 238 | 10692 | 13529 | 392 | 18684 | 218 | 10433 | 7346 | 231 | 10331 | 152 | 6002 | 3339 | 185 | 8494 | 60 | NA | 2397 | 119 | NA | NA | NA | 1656 | 116 | NA | NA | NA | NA | NA | NA | NA | 5718 |
| ASD-002 | 140381 | 58459 | 1417 | 49905 | 644 | 29956 | 58115 | 1366 | 49488 | 634 | 29956 | 16624 | 479 | 22099 | 175 | 3327 | 14743 | 371 | 20451 | 152 | 3108 | 7976 | 206 | 11448 | 104 | 1708 | 3579 | 160 | 9476 | 35 | NA | 2612 | 100 | NA | NA | NA | 1749 | 85 | NA | NA | NA | NA | NA | NA | NA | 1454 |
| ASD-012 | 227626 | 64029 | 5034 | 53568 | 1595 | 103400 | 63626 | 4945 | 53108 | 1588 | 103400 | 17296 | 508 | 21936 | 176 | 4667 | 15675 | 415 | 20461 | 153 | 4438 | 8438 | 243 | 11223 | 89 | 2419 | 3889 | 179 | 9163 | 31 | NA | 2779 | 114 | NA | NA | NA | 1889 | 113 | NA | NA | NA | NA | NA | NA | NA | 2102 |
| ASD-015 | 214910 | 56637 | 4341 | 50012 | 1678 | 102242 | 56259 | 4281 | 49684 | 1671 | 102242 | 16095 | 455 | 20680 | 172 | 5171 | 14430 | 365 | 19400 | 157 | 4920 | 7801 | 220 | 10710 | 128 | 2763 | 3593 | 173 | 8782 | 51 | NA | 2537 | 111 | NA | NA | NA | 1728 | 110 | NA | NA | NA | NA | NA | NA | NA | 2422 |
| ASD-018 | 150516 | 47551 | 2004 | 42073 | 949 | 57939 | 47339 | 2004 | 41878 | 946 | 57939 | 13076 | 399 | 16892 | 140 | 3604 | 11848 | 331 | 15737 | 120 | 3497 | 6470 | 183 | 8794 | 74 | 1922 | 2969 | 139 | 7192 | 30 | NA | 2104 | 78 | NA | NA | NA | 1480 | 77 | NA | NA | NA | NA | NA | NA | NA | 1663 |
| ASD-056 | 110424 | 40506 | 1176 | 44159 | 553 | 24030 | 40248 | 1143 | 43876 | 551 | 24030 | 14416 | 430 | 19849 | 146 | 3000 | 12767 | 348 | 18339 | 124 | 2835 | 7042 | 213 | 10266 | 84 | 1620 | 3202 | 165 | 8577 | 26 | NA | 2298 | 99 | NA | NA | NA | 1606 | 103 | NA | NA | NA | NA | NA | NA | NA | 1446 |
| ASD-069 | 135598 | 47170 | 1828 | 43571 | 854 | 42175 | 46871 | 1791 | 43320 | 851 | 42175 | 14770 | 482 | 19389 | 211 | 3279 | 13231 | 406 | 18086 | 183 | 3112 | 7244 | 259 | 10000 | 124 | 1759 | 3288 | 210 | 8253 | 39 | NA | 2406 | 125 | NA | NA | NA | 1683 | 124 | NA | NA | NA | NA | NA | NA | NA | 1502 |
| ASD-100 | 126298 | 47665 | 1644 | 49411 | 656 | 26922 | 47358 | 1594 | 49066 | 648 | 26922 | 16140 | 467 | 21503 | 198 | 2414 | 14303 | 361 | 19930 | 175 | 2231 | 7717 | 214 | 11001 | 114 | 1251 | 3578 | 161 | 9105 | 33 | NA | 2596 | 95 | NA | NA | NA | 1807 | 94 | NA | NA | NA | NA | NA | NA | NA | 1033 |
| ASD-073 | 114300 | 44970 | 1022 | 38802 | 548 | 28958 | 44739 | 977 | 38568 | 545 | 28958 | 12665 | 404 | 16833 | 170 | 3744 | 11124 | 319 | 15474 | 145 | 3581 | 6027 | 202 | 8589 | 103 | 2050 | 2834 | 155 | 7036 | 39 | NA | 2027 | 104 | NA | NA | NA | 1392 | 104 | NA | NA | NA | NA | NA | NA | NA | 1883 |
| ASD-059 | 53263 | 17153 | 569 | 20800 | 247 | 14494 | 17148 | 569 | 20800 | 240 | 14494 | 16838 | 569 | 20709 | 239 | 14488 | 15159 | 483 | 19333 | 219 | 14131 | 8216 | 304 | 10643 | 157 | 8118 | 3803 | 251 | 8585 | 62 | NA | 2629 | 155 | NA | NA | NA | 1701 | 154 | NA | NA | NA | NA | NA | NA | NA | 7732 |
| ASD-025 | 218687 | 51235 | 3361 | 42038 | 1874 | 120179 | 50968 | 3301 | 41791 | 1868 | 120179 | 13985 | 433 | 17228 | 175 | 3949 | 12574 | 352 | 16056 | 153 | 3786 | 6789 | 200 | 8806 | 97 | 2158 | 3099 | 154 | 7226 | 27 | NA | 2263 | 91 | NA | NA | NA | 1558 | 91 | NA | NA | NA | NA | NA | NA | NA | 1894 |
| ASD-008 | 248111 | 51701 | 3153 | 51808 | 2066 | 139383 | 51292 | 3095 | 51419 | 2060 | 139383 | 17462 | 506 | 22308 | 179 | 6173 | 15694 | 391 | 20842 | 157 | 5943 | 8515 | 207 | 11394 | 110 | 3386 | 3780 | 156 | 9249 | 41 | NA | 2712 | 92 | NA | NA | NA | 1853 | 91 | NA | NA | NA | NA | NA | NA | NA | 3068 |
| ASD-019 | 42959 | 16359 | 465 | 20811 | 241 | 5083 | 16356 | 465 | 20811 | 238 | 5083 | 16131 | 464 | 20730 | 238 | 5080 | 14442 | 363 | 19298 | 215 | 4903 | 7847 | 200 | 10737 | 153 | 2773 | 3683 | 163 | 8862 | 61 | NA | 2648 | 99 | NA | NA | NA | 1795 | 99 | NA | NA | NA | NA | NA | NA | NA | 2519 |
| ASD-004 | 41591 | 16019 | 466 | 20554 | 298 | 4254 | 16016 | 466 | 20554 | 294 | 4254 | 15783 | 466 | 20554 | 292 | 4252 | 14192 | 372 | 19082 | 270 | 4046 | 7710 | 224 | 10347 | 169 | 2250 | 3482 | 175 | 8504 | 59 | NA | 2494 | 105 | NA | NA | NA | 1685 | 104 | NA | NA | NA | NA | NA | NA | NA | 2005 |
| ASD-070 | 52344 | 18305 | 546 | 22726 | 305 | 10462 | 18300 | 546 | 22726 | 288 | 10462 | 17998 | 546 | 22612 | 285 | 10454 | 16177 | 441 | 21151 | 254 | 10108 | 8866 | 264 | 11636 | 183 | 5808 | 3964 | 201 | 9431 | 61 | NA | 2809 | 127 | NA | NA | NA | 1891 | 124 | NA | NA | NA | NA | NA | NA | NA | 5419 |
| ASD-041 | 51182 | 17293 | 573 | 21317 | 339 | 11660 | 17291 | 573 | 21317 | 322 | 11660 | 16968 | 573 | 21223 | 322 | 11655 | 15308 | 466 | 19835 | 296 | 11288 | 8297 | 295 | 10766 | 196 | 6403 | 3746 | 241 | 8643 | 79 | NA | 2662 | 157 | NA | NA | NA | 1801 | 157 | NA | NA | NA | NA | NA | NA | NA | 6021 |
| ASD-068 | 154420 | 55131 | 2245 | 44025 | 918 | 52101 | 54721 | 2135 | 43521 | 909 | 52101 | 8923 | 438 | 12276 | 178 | 1684 | 8167 | 334 | 11357 | 146 | 1486 | 4455 | 203 | 6277 | 78 | 822 | 1932 | 149 | 5374 | 23 | NA | 1394 | 93 | NA | NA | NA | 989 | 92 | NA | NA | NA | NA | NA | NA | NA | 685 |
| ASD-026 | 223208 | 62623 | 4190 | 48574 | 1739 | 106082 | 62228 | 4122 | 48159 | 1729 | 106082 | 16832 | 532 | 21167 | 234 | 4721 | 15111 | 432 | 19672 | 213 | 4473 | 8186 | 252 | 10733 | 141 | 2474 | 3750 | 204 | 8748 | 40 | NA | 2723 | 123 | NA | NA | NA | 1890 | 121 | NA | NA | NA | NA | NA | NA | NA | 2158 |

SV: structural variant; del: deletion; dup: duplication; ins: insertion; inv:inversion; tra: translocation; NA: not applicable
