# Supplementary material for: Long read whole genome sequencing-based discovery of complex structural variants and their role in aetiology of non-syndromic autism spectrum disorder in India
Source: Research Square preprint supplement (doi:10.21203/rs.3.rs-5950423/v1), 2025-02-05
Supplement: Supplementary file 2 [file 4487a2ce34ecbf75f1c0f400.xlsx]

## Sheet: Supplementary Table_Phenotype
Supplementary File 2: Phenotypic description of 23 ASD probands in the present study cohort.
Sr. No	Patient ID	Gender	Age	Age at diagnosis	Head circumference	Centile	Microcephaly	Macrocephaly	Developmental delay	Speech delay	Intellectual disability	Regression	Subtle dysmorphic facial feature	Seizure	Brain malformation	Abnormal gait	Neuropathy	Hearing/ visual loss	Repetitive movement	Self harm	Echolalia	DSM-5 classification		Additonal phenotype/ history
																						Social communication	Restrictive and repetative behaviour
1	ASD-002	Male	7y 3m	2y 6m	54 cm	above 97th centile	-	√	√	√	√	-	-	-	-	-	-	-	√	√	√	Mild	Moderate	Repeated pulmonary infection, throws tantrums and moody, flat foot, decreased muscle tone, ?minor bone abnormality at occiput
2	ASD-004	Female	11y 3m	2y 6m	56 cm	above 97th centile	-	-	√	√	√	-	-	-	-	-	-	√	√	-	√	Moderate	Moderate	Muconium aspiration and hospitalised for 10 days, poor eye contact, exotropia. IVF pregnancy
3	ASD-008	Male	12y	2y 6m	56 cm	above 97th centile	-	-	√	√	√	√	-	-	-	-	-	√	√	√	√	Moderate	Moderate	Maternal grandfather had symptoms of ASD. Absence seizures on EEG - on sodium valporate for 4 years. MRI-Normal. IUI conception
4	ASD-012	Female	8y 2m	2y 6m	53 cm	above 97th centile	-	-	√	√	√	√	-	-	-	-	-	-	√	-	√	Moderate	Moderate	Calcium/ Phosphorus/Electrolyte disturbance. Heavy metal study- lead, mercury- high- biomedical & chelation therapy done. Organic acid tests done. At present on homeopathy, therapies- ABA
5	ASD-015	Male	3y 5m	3y 5m	52 cm	50-97th centile	-	-	√	√	√	√	-	-	-	-	-	-	√	-	√	Severe	Moderate	3rd degree maternal relative has autism, EEG- normal
6	ASD-018	Male	6y 10m	3y	52 cm	50-97th centile	-	-	√	√	√	√	√	√	-	-	-	-	√	√	√	Moderate	Moderate	Triangular face, knee lock, broad face, flat occiput, regression at the age of 3 years, admitted at 2.5 years due to bronchiolitis, medication for hyperactivity
7	ASD-019	Male	4y 8m	3y 3m	51.5 cm	50-97th centile	-	-	√	√	√	√	-	-	-	-	-	-	√	√	√	Moderate	Moderate	H/o admission at 1.5 years for pnemonia, metabolic screenong-normal, basic blood report-normal
8	ASD-023	Female	9y	NA	47 cm	below 3rd centile	√	-	√	√	√	-	√	√	-	-	-	-	√	√	√	Moderate	Severe	EEG-abnormal discharges from right frontoparital area and left occipito-frontal area.Eye test and MRI done - no reports available. 2nd degree consanguinity. Preterm bith, under weight at birth,asphyxia admiited to hospital for 45 days, hypoglycemia, IUGR
9	ASD-025	Female	3y 5m	2y	51.5 cm	50-97th centile	-	-	√	√	√	-	-	√	-	-	-	-	√	√	√	Moderate	Moderate	Increased sugar during pregnancy, polyhydramnios, convulsion at 9 months. Repeated urine infection
10	ASD-026	Male	6y 5m	5y	52 cm	50-97th centile	-	-	√	√	√	-	-	-	-	-	-	√	√	√	√	Severe	Severe	MRI and EEG - normal, CARS score - 43, DQ - 44
11	ASD-041	Male	9y 5m	NA	57 cm	above 97th centile	-	-	√	√	√	-	√	-	-	-	-	-	√	√	√	Moderate	Mild	NICU admission due to food poisioning for 1 week. Cup shapped ears. Maternal grandmother's brother did not have one eye and developmental delay. One pregnancy was aborted at 5 months due to spina bifida
12	ASD-042	Female	4y	4y	47.5 cm	3-50th centile	-	-	√	√	√	-	-	-	-	-	-	-	√	-	√	Moderate	Moderate	-
13	ASD-056	Male	2y 4m	2y 3m	48 cm	3-50th centile	-	-	√	√	√	√	-	-	-	-	-	-	√	√	√	Severe	Moderate	MRI-normal, H/o tremor
14	ASD-059	Female	2y 1m	2y	47.7 cm	50-97th centile	-	-	√	√	√	-	√	-	-	√	-	-	√	√	√	Moderate	Moderate	Hypopigmented spot on left calf, small cafe au-lait spot on left side lower abdomen, B/L clinodactyly, Cupid's bow, Retrognathia, broad nose nasal bone, depressed nasal bridge, strabismus, long eye lashes,
15	ASD-063	Female	2y 2m	2y	47.5 cm	50th centile	-	-	√	√	√	-	-	-	-	-	-	-	√	√	-	Moderate	Mild	Less severely affected than brother, no dysmorphism, premature birth, mother had PCOD
16	ASD-068	Female	6y 10m	NA	51 cm	50-97th centile	-	-	√	√	√	√	-	√	-	-	-	-	√	√	√	Moderate	Mild	Child’s paternal uncle- committed suicide at 12 years of age, Mother’s younger sister- optic nerve sheath meningioma, Mother- ? some brain tumor, Father- cancer of vocal cord- on Rx. Epicanthus, B/L clinodactyly, MRI-Abnormal architecture of left hippocampus with ventricle orientation of left collateral sulcus, suggest possibility of incomplete hippocampal inversion. EEG-frequent generalised spik…
17	ASD-069	Female	4y 3m	1y 9m	48 cm	3-50th centile	-	-	√	√	√	√	-	-	-	-	-	-	√	√	√	Moderate	Moderate	Mother had fibroid during pregnancy, mother's sister's daughter has autism. Small hypopigmented spot on right thigh, BERA-normal, EEG-normal, Heavy metal and hair metal test done. Loss of speech.
18	ASD-070	Male	7y	2y 6m	52 cm	50-97th centile	-	-	√	√	√	-	√	-	-	-	-	-	√	√	√	Moderate	Mild	Telecanthus, beaked nose, bruxisum, MRI-normal, EEG-normal, BERA-normal, blood report-normal, admitted twice due to bronchiolitis, mother had gestational hypertension
19	ASD-073	Male	2y 10m	2y	50.5 cm	50-97th centile	-	-	√	√	√	√	√	-	-	-	-	-	√	√	√	Moderate	Moderate	Premature birth and neonatal jaundice, father's mother had repetative death of children. subtle low set ears, Cafe-au lait on abdomen and soullder, triangular face, long eye lashes, cupid's bow, ear differences, periorbital fullness mild. BERA-normal
20	ASD-083	Female	3y	2y 6m	47 cm	3-50th centile	-	-	√	√	√	√	-	-	-	-	-	-	√	√	√	Moderate	Moderate	Premature birth. Flat face, wide spaced eyes, scaral dimple on both the sides, birth mark right buttuck, euthyroid. Mother is hypothyroidism. Father's brother expired due to hydrocephalus.
21	ASD-090	Male	2y 10m	2y	54 cm	50-97th centile	-	-	√	√	√	-	-	-	-	-	-	-	√	√	√	Moderate	Moderate	Monochorionic diamniotic twins. EEG and BERA-normal. Maternal hypothyroidism
22	ASD-096	Male	11y 5m	1y 6m	54 cm	above 97th centile	-	√	√	√	√	√	-	-	-	-	-	-	√	√	√	Moderate	Moderate	ADHD. Cannot rotate tongue upward. BERA-normal. Teeth abnormality. Sensory issue. Paternal grandmother had psychological problem. Proband borther show early sign of ASD. Father has brain tumor
23	ASD-100	Male	2y 1m	2y	47.5 cm	3-50th centile	-	-	√	√	√	√	-	-	-	-	-	-	√	√	√	Moderate	Moderate	-
Legends: '√': present; '-': absent, Unk: unknown; NA: not available; y: year; m: month
