# Supplementary material for: Long read whole genome sequencing-based discovery of complex structural variants and their role in aetiology of non-syndromic autism spectrum disorder in India
Source: Research Square preprint supplement (doi:10.21203/rs.3.rs-5950423/v1), 2025-02-05
Supplement: Supplementary file 3 [file 56554add593ffc8fc4487928.docx]

**Supplementary file 7:** Primer sequences and orthogonal methods used for validation of SVs

| Sr No | **Case ID** | **SV type** | **Validation method** | **Primer Name** | **Primer sequence** |
| --- | --- | --- | --- | --- | --- |
| 1 | ASD-090 | Inversion | Breakpoint PCR | SNAP25 BP1 FP | TCTAGCAACGTCTGGAACCA |
| 2 | SNAP25 BP1 RP | TACTGCTGATGGACGGACTC |
| 3 | SNAP25 BP2 FP | CAGTGGGCATGGAGTACC |
| 4 | SNAP25 BP2 RP | TTCATCAGTCTGGGGAAGCC |

SV: structural variant; BP: break point; FP: forward primer; RP: reverse primer
