# Supplementary material for: Long read whole genome sequencing-based discovery of complex structural variants and their role in aetiology of non-syndromic autism spectrum disorder in India
Source: Research Square preprint supplement (doi:10.21203/rs.3.rs-5950423/v1), 2025-02-05
Supplement: Supplementary file 4 [file ad9a43683fe216efbe814ede.docx]

**Supplementary File 3:** Pre and post sequencing run details

| **Sr No** | **Case ID** | **Run** | **Sequencing kit** | **Flow cell type** | **Pores** | **Output data type** | **Read count (M*)** | **N50 (kb)** | **Output data (Gigabases)** | **Approximate combined depth (X)** |
| --- | --- | --- | --- | --- | --- | --- | --- | --- | --- | --- |
| 1 | ASD-063 | A | SQK-LSK112 | R10.4 | 1300 | fast5 | 1.01 | 14.07 | 8.03 | 4.6 |
| B | SQK-LSK112 | R10.4 | 1480 | fast5 | 0.793 | 17.45 | 7.3 |
| 2 | ASD-096 | A | SQK-LSK112 | R10.4 | 1529 | fast5 | 2.4 | 7.4 | 8.93 | 5.4 |
| B | SQK-LSK112 | R10.4 | 1534 | fast5 | 2.82 | 7.53 | 8.89 |
| 3 | ASD-090 | A | SQK-LSK112 | R10.4 | 1273 | fast5 | 2.8 | 5.07 | 7.71 | 6 |
| B | SQK-LSK112 | R9.4.1 | 1175 | fast5 | 4.46 | 4.71 | 12.13 |
| 4 | ASD-023 | A | SQK-LSK112 | R9.4.1 | 1580 | fast5 | 1.76 | 13.5 | 11.82 | 7.8 |
| B | SQK-LSK112 | R9.4.1 | 1624 | fast5 | 2.18 | 12.53 | 13.76 |
| 5 | ASD-083 | A | SQK-LSK112 | R9.4.1 | 1428 | fast5 | 1.88 | 7.38 | 7.12 | 5 |
| B | SQK-LSK112 | R9.4.1 | 1535 | fast5 | 2.64 | 7.97 | 9.47 |
| 6 | ASD-042 | A | SQK-LSK112 | R9.4.1 | 1266 | fast5 | 3.32 | 6.35 | 7.87 | 7.7 |
| B | SQK-LSK114 | R10.4 | 1570 | pod5 | 4.38 | 5.35 | 17.57 |
| 7 | ASD-002 | A | SQK-LSK114 | R10.4 | 1537 | pod5 | 2.34 | 8.12 | 11.17 | 6.5 |
| B | SQK-LSK114 | R10.4 | 1546 | pod5 | 2.25 | 8.52 | 10.19 |
| 8 | ASD-012 | A | SQK-LSK114 | R10.4 | 1443 | pod5 | 5.53 | 3.96 | 14.09 | 9.3 |
| B | SQK-LSK114 | R10.4 | 1375 | pod5 | 7.38 | 3.65 | 16.6 |
| 9 | ASD-015 | A | SQK-LSK114 | R10.4 | 1498 | pod5 | 6.2 | 4.16 | 17.66 | 8.1 |
| B | SQK-LSK114 | R10.4 | 917 | pod5 | 3.33 | 4.26 | 9.15 |
| 10 | ASD-018 | A | SQK-LSK114 | R10.4 | 1350 | pod5 | 3.92 | 4.76 | 12.63 | 6.3 |
| B | SQK-LSK114 | R10.4 | 1133 | pod5 | 2.68 | 4.45 | 8.09 |
| 11 | ASD-056 | A | SQK-LSK114 | R10.4 | 1074 | pod5 | 669.24 k* | 11.51 | 4.46 | 4.7 |
| B | SQK-LSK114 | R10.4 | 1576 | pod5 | 2.01 | 9.54 | 10.99 |
| 12 | ASD-069 | A | SQK-LSK114 | R10.4 | 1368 | pod5 | 2.51 | 4.95 | 7.91 | 5.6 |
| B | SQK-LSK114 | R10.4 | 1267 | pod5 | 3.04 | 5.14 | 10.55 |
| 13 | ASD-100 | A | SQK-LSK114 | R10.4 | 1172 | pod5 | 1.55 | 8.28 | 7.21 | 6.1 |
| B | SQK-LSK114 | R10.4 | 1212 | pod5 | 2.84 | 8.21 | 12.95 |
| 14 | ASD-073 | A | SQK-LSK114 | R10.4 | 1181 | pod5 | 1.51 | 7.82 | 6.84 | 4.1 |
| B | SQK-LSK114 | R10.4 | 1429 | pod5 | 1.63 | 7.6 | 6.72 |
| 15 | ASD-059 | A | SQK-LSK114 | R10.4 | 1364 | pod5 | 7.91 | 3.31 | 18.08 | 9.8 |
| B | SQK-LSK114 | R10.4 | 1013 | pod5 | 6.26 | 3.14 | 13.89 |
| 16 | ASD-025 | A | SQK-LSK114 | R10.4 | 1342 | pod5 | 4.15 | 3.65 | 9.35 | 6.3 |
| B | SQK-LSK114 | R10.4 | 1379 | pod5 | 4.87 | 3.77 | 11.37 |
| 17 | ASD-008 | A | SQK-LSK114 | R10.4 | 1325 | pod5 | 4.99 | 4.68 | 16.9 | 8 |
| B | SQK-LSK114 | R10.4 | 1090 | pod5 | 2.85 | 4.66 | 9.62 |
| 18 | ASD-019 | A | SQK-LSK114 | R10.4 | 1262 | pod5 | 2.07 | 10.81 | 13.24 | 7.9 |
| B | SQK-LSK114 | R10.4 | 1233 | pod5 | 3.12 | 6.15 | 12.98 |
| 19 | ASD-004 | A | SQK-LSK114 | R10.4 | 1488 | pod5 | 3.55 | 7.99 | 15.94 | 6.9 |
| B | SQK-LSK114 | R10.4 | 1086 | pod5 | 1.8 | 5.71 | 6.72 |
| 20 | ASD-070 | A | SQK-LSK114 | R10.4 | 1469 | pod5 | 8.92 | 3.4 | 20.41 | 9.9 |
| B | SQK-LSK114 | R10.4 | 1319 | pod5 | 4.48 | 4.17 | 12.26 |
| 21 | ASD-041 | A | SQK-LSK114 | R10.4 | 1424 | pod5 | 7.75 | 2.9 | 14.85 | 9.6 |
| B | SQK-LSK114 | R10.4 | 1384 | pod5 | 8.62 | 2.92 | 16.7 |
| 22 | ASD-068 | A | SQK-LSK114 | R10.4 | 1534 | pod5 | 2.26 | 9.47 | 12.84 | 7.9 |
| B | SQK-LSK114 | R10.4 | 1441 | pod5 | 2.71 | 8.18 | 13.16 |
| 23 | ASD-026 | A | SQK-LSK114 | R10.4 | 1508 | pod5 | - | - | - | - |
| B | SQK-LSK114 | R10.4 | 1401 | pod5 | 4.89 | 4.27 | 13.17 |

*M: million; k: thousand
