# Supplementary material for: Long read whole genome sequencing-based discovery of complex structural variants and their role in aetiology of non-syndromic autism spectrum disorder in India
Source: Research Square preprint supplement (doi:10.21203/rs.3.rs-5950423/v1), 2025-02-05
Supplement: Supplementary file 5 [file ae9494578d268d43fa078a67.docx]

**Supplementary File 4:** Number of variants called for each sample across different SV types by each variant caller

| **Case ID** | **Number of variants called** | | | | | | |
| --- | --- | --- | --- | --- | --- | --- | --- |
| **SV type** | **Variant callers** | | | | | |
| **npInv** | **cuteSV** | **Sniffles2** | **SVIM** | **NanoVar** | **Total** |
| ASD-063 | **del** | NA | 213 | 4908 | 15501 | 4690 | **25312** |
| **dup** | NA | 7 | 10 | 590 | 232 | **839** |
| **ins** | NA | 110 | 6530 | 18452 | 6657 | **31749** |
| **inv** | 10 | 0 | 17 | 93 | 72 | **192** |
| **tra** | NA | 6 | 389 | 5465 | 367 | **6227** |
| **total** | **10** | **336** | **11854** | **40101** | **12018** | **64319** |
|  | | | | | | | |
| ASD-096 | **del** | NA | 222 | 6028 | 23705 | 5945 | **35900** |
| **dup** | NA | 7 | 11 | 2219 | 242 | **2479** |
| **ins** | NA | 168 | 7515 | 21941 | 7600 | **37224** |
| **inv** | 12 | 2 | 29 | 236 | 133 | **412** |
| **tra** | NA | 9 | 688 | 13920 | 904 | **15521** |
| **total** | **12** | **408** | **14271** | **62021** | **14824** | **91536** |
|  | | | | | | | |
| ASD-090 | **del** | NA | 289 | 6886 | 25045 | 6646 | **38866** |
| **dup** | NA | 15 | 30 | 2047 | 369 | **2461** |
| **ins** | NA | 234 | 8361 | 21396 | 8387 | **38378** |
| **inv** | 9 | 0 | 47 | 875 | 95 | **1026** |
| **tra** | NA | 17 | 1654 | 52532 | 1902 | **56105** |
| **total** | **9** | **555** | **16978** | **101895** | **17399** | **136836** |
|  | | | | | | | |
| ASD-023 | **del** | NA | 805 | 8354 | 35283 | 7452 | **51894** |
| **dup** | NA | 45 | 22 | 1428 | 339 | **1834** |
| **ins** | NA | 893 | 13682 | 157001 | 11765 | **183341** |
| **inv** | 32 | 5 | 75 | 492 | 158 | **762** |
| **tra** | NA | 18 | 1167 | 28744 | 813 | **30742** |
| **total** | **32** | **1766** | **23300** | **222948** | **20527** | **268573** |
|  | | | | | | | |
| ASD-083 | **del** | NA | 256 | 5874 | 27106 | 5609 | **38845** |
| **dup** | NA | 37 | 12 | 1326 | 269 | **1644** |
| **ins** | NA | 187 | 9406 | 189409 | 9459 | **208461** |
| **inv** | 13 | 0 | 52 | 859 | 155 | **1079** |
| **tra** | NA | 16 | 1328 | 57057 | 1526 | **59927** |
| **total** | **13** | **496** | **16672** | **275757** | **17018** | **309956** |
|  | | | | | | | |
| ASD-042 | **del** | NA | 533 | 7694 | 26580 | 7211 | **42018** |
| **dup** | NA | 19 | 28 | 3561 | 434 | **4042** |
| **ins** | NA | 452 | 10085 | 31978 | 9589 | **52104** |
| **inv** | 17 | 3 | 100 | 1559 | 124 | **1803** |
| **tra** | NA | 16 | 6158 | 107413 | 4518 | **118105** |
| **total** | **17** | **1023** | **24065** | **171091** | **21876** | **218072** |
|  | | | | | | | |
| ASD-002 | **del** | NA | 851 | 8375 | 41516 | 7717 | **58459** |
| **dup** | NA | 27 | 33 | 939 | 418 | **1417** |
| **ins** | NA | 755 | 11032 | 27734 | 10383 | **49904** |
| **inv** | 28 | 4 | 52 | 458 | 102 | **644** |
| **tra** | NA | 22 | 1741 | 26626 | 1567 | **29956** |
| **total** | **28** | **1659** | **21233** | **97273** | **20187** | **140380** |
|  | | | | | | | |
| ASD-012 | **del** | NA | 1203 | 8654 | 46442 | 7730 | **64029** |
| **dup** | NA | 36 | 37 | 4528 | 433 | **5034** |
| **ins** | NA | 1114 | 11096 | 31567 | 9791 | **53568** |
| **inv** | 23 | 3 | 60 | 1411 | 98 | **1595** |
| **tra** | NA | 51 | 3224 | 98728 | 1397 | **103400** |
| **total** | **23** | **2407** | **23071** | **182676** | **19449** | **227626** |
|  | | | | | | | |
| ASD-015 | **del** | NA | 793 | 8092 | 40345 | 7407 | **56637** |
| **dup** | NA | 27 | 33 | 3881 | 400 | **4341** |
| **ins** | NA | 711 | 10428 | 29285 | 9588 | **50012** |
| **inv** | 16 | 2 | 73 | 1497 | 90 | **1678** |
| **tra** | NA | 39 | 3267 | 97067 | 1869 | **102242** |
| **total** | **16** | **1572** | **21893** | **172075** | **19354** | **214910** |
|  | | | | | | | |
| ASD-018 | **del** | NA | 314 | 6561 | 34329 | 6347 | **47551** |
| **dup** | NA | 18 | 26 | 1607 | 353 | **2004** |
| **ins** | NA | 239 | 8321 | 25133 | 8380 | **42073** |
| **inv** | 7 | 2 | 42 | 805 | 93 | **949** |
| **tra** | NA | 16 | 1844 | 54334 | 1745 | **57939** |
| **total** | **7** | **589** | **16794** | **116208** | **16918** | **150516** |
|  | | | | | | | |
| ASD-056 | **del** | NA | 489 | 7350 | 25845 | 6822 | **40506** |
| **dup** | NA | 20 | 17 | 748 | 391 | **1176** |
| **ins** | NA | 390 | 9974 | 24216 | 9579 | **44159** |
| **inv** | 17 | 3 | 42 | 405 | 86 | **553** |
| **tra** | NA | 14 | 1485 | 21028 | 1503 | **24030** |
| **total** | **17** | **916** | **18868** | **72242** | **18381** | **110424** |
|  | | | | | | | |
| ASD-069 | **del** | NA | 496 | 7432 | 32178 | 7064 | **47170** |
| **dup** | NA | 23 | 34 | 1349 | 422 | **1828** |
| **ins** | NA | 370 | 9729 | 24120 | 9352 | **43571** |
| **inv** | 18 | 7 | 57 | 638 | 134 | **854** |
| **tra** | NA | 20 | 1613 | 38894 | 1648 | **42175** |
| **total** | **18** | **916** | **18865** | **97179** | **18620** | **135598** |
|  | | | | | | | |
| ASD-100 | **del** | NA | 742 | 8225 | 31211 | 7487 | **47665** |
| **dup** | NA | 20 | 33 | 1179 | 412 | **1644** |
| **ins** | NA | 640 | 10854 | 27808 | 10109 | **49411** |
| **inv** | 28 | 5 | 46 | 450 | 127 | **656** |
| **tra** | NA | 17 | 1224 | 24504 | 1177 | **26922** |
| **total** | **28** | **1424** | **20382** | **85152** | **19312** | **126298** |
|  | | | | | | | |
| ASD-073 | **del** | NA | 391 | 6429 | 32049 | 6101 | **44970** |
| **dup** | NA | 17 | 23 | 619 | 363 | **1022** |
| **ins** | NA | 220 | 8385 | 21893 | 8304 | **38802** |
| **inv** | 12 | 1 | 51 | 375 | 109 | **548** |
| **tra** | NA | 16 | 1804 | 25212 | 1926 | **28958** |
| **total** | **12** | **645** | **16692** | **80148** | **16803** | **114300** |
|  | | | | | | | |
| ASD-059 | **del** | NA | 1119 | 8412 | - | 7622 | **17153** |
| **dup** | NA | 33 | 51 | - | 485 | **569** |
| **ins** | NA | 997 | 10469 | - | 9334 | **20800** |
| **inv** | 18 | 7 | 122 | - | 100 | **247** |
| **tra** | NA | 60 | 10879 | - | 3555 | **14494** |
| **total** | **18** | **2216** | **29933** | - | **21096** | **53263** |
|  | | | | | | | |
| ASD-025 | **del** | NA | 467 | 6924 | 37053 | 6791 | **51235** |
| **dup** | NA | 26 | 24 | 2933 | 378 | **3361** |
| **ins** | NA | 328 | 8532 | 24756 | 8422 | **42038** |
| **inv** | 15 | 3 | 44 | 1692 | 120 | **1874** |
| **tra** | NA | 21 | 2149 | 116230 | 1779 | **120179** |
| **total** | **15** | **845** | **17673** | **182664** | **17490** | **218687** |
|  | | | | | | | |
| ASD-008 | **del** | NA | 1029 | 8777 | 34025 | 7870 | **51701** |
| **dup** | NA | 34 | 45 | 2648 | 426 | **3153** |
| **ins** | NA | 945 | 11329 | 29454 | 10080 | **51808** |
| **inv** | 18 | 6 | 67 | 1879 | 96 | **2066** |
| **tra** | NA | 35 | 3981 | 133206 | 2161 | **139383** |
| **total** | **18** | **2049** | **24199** | **201212** | **20633** | **248111** |
|  | | | | | | | |
| ASD-019 | **del** | NA | 677 | 8429 | - | 7253 | **16359** |
| **dup** | NA | 33 | 35 | - | 397 | **465** |
| **ins** | NA | 612 | 10763 | - | 9436 | **20811** |
| **inv** | 13 | 0 | 65 | - | 163 | **241** |
| **tra** | NA | 20 | 3126 | - | 1937 | **5083** |
| **total** | **13** | **1342** | **22418** | - | **19186** | **42959** |
|  | | | | | | | |
| ASD-004 | **del** | NA | 696 | 8140 | - | 7183 | **16019** |
| **dup** | NA | 31 | 31 | - | 404 | **466** |
| **ins** | NA | 586 | 10642 | - | 9326 | **20554** |
| **inv** | 18 | 3 | 63 | - | 214 | **298** |
| **tra** | NA | 15 | 2584 | - | 1655 | **4254** |
| **total** | **18** | **1331** | **21460** | - | **18782** | **41591** |
|  | | | | | | | |
| ASD-070 | **del** | NA | 1514 | 8930 | - | 7861 | **18305** |
| **dup** | NA | 39 | 59 | - | 448 | **546** |
| **ins** | NA | 1633 | 11304 | - | 9789 | **22726** |
| **inv** | 32 | 9 | 129 | - | 135 | **305** |
| **tra** | NA | 65 | 8094 | - | 2303 | **10462** |
| **total** | **32** | **3260** | **28516** | - | **20536** | **52344** |
|  | | | | | | | |
| ASD-041 | **del** | NA | 1217 | 8705 | - | 7371 | **17293** |
| **dup** | NA | 44 | 63 | - | 466 | **573** |
| **ins** | NA | 1303 | 10884 | - | 9130 | **21317** |
| **inv** | 33 | 5 | 145 | - | 156 | **339** |
| **tra** | NA | 73 | 8336 | - | 3251 | **11660** |
| **total** | **33** | **2642** | **28133** | - | **20374** | **51182** |
|  | | | | | | | |
| ASD-068 | **del** | NA | 1306 | - | 45891 | 7934 | **55131** |
| **dup** | NA | 31 | - | 1811 | 403 | **2245** |
| **ins** | NA | 1374 | - | 31653 | 10998 | **44025** |
| **Inv** | 31 | 13 | - | 729 | 145 | **918** |
| **tra** | NA | 32 | - | 50415 | 1654 | **52101** |
| **total** | **31** | **2756** | - | **130499** | **21134** | **154420** |
|  | | | | | | | |
| ASD-026 | **del** | NA | 998 | 8411 | 45507 | 7707 | **62623** |
| **dup** | NA | 28 | 38 | 3661 | 463 | **4190** |
| **ins** | NA | 885 | 10769 | 27343 | 9577 | **48574** |
| **inv** | 29 | 6 | 79 | 1492 | 133 | **1739** |
| **tra** | NA | 38 | 2907 | 101360 | 1777 | **106082** |
| **total** | **29** | **1955** | **22204** | **179363** | **19657** | **223208** |

“-”: The annotated VCFs were not generated using AnnotSV likely due to large file size.

SV: structural variant; del: deletion; dup: duplication; ins: insertion; inv: inversion; tra: translocation; NA: not applicable
