# Supplementary material for: Long read whole genome sequencing-based discovery of complex structural variants and their role in aetiology of non-syndromic autism spectrum disorder in India
Source: Research Square preprint supplement (doi:10.21203/rs.3.rs-5950423/v1), 2025-02-05
Supplement: Supplementary file 6 [file bd7696e50c6ecfc15b92a9f1.docx]

**Supplementary File 1:** Pedigree charts of the selected 23 ASD patient-parent trios in the current cohort.

| ASD-002  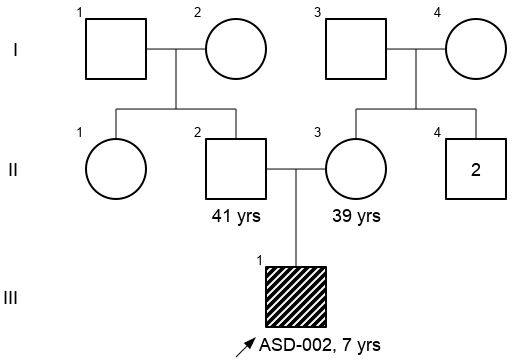 | ASD-004  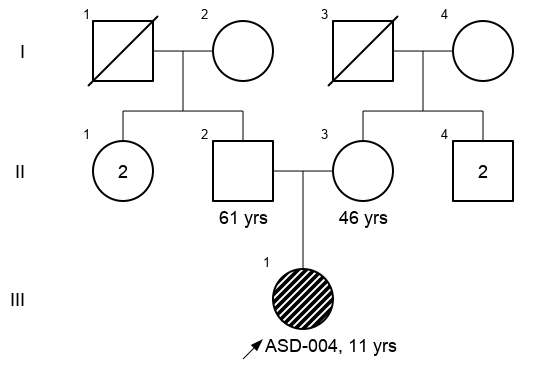 |
| --- | --- |
| ASD-008  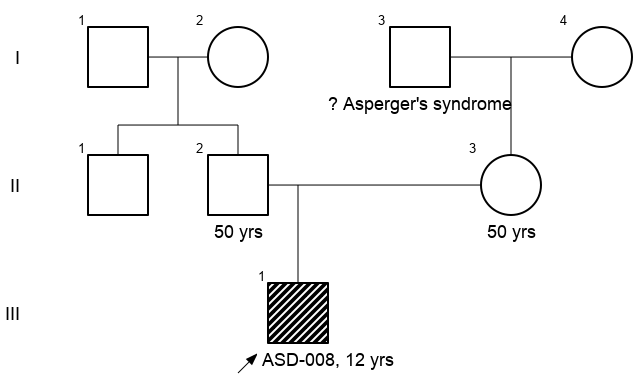 | ASD-012  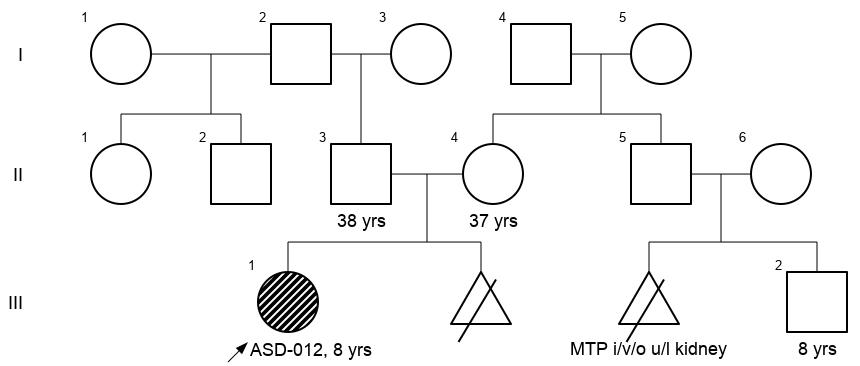 |
| ASD-015  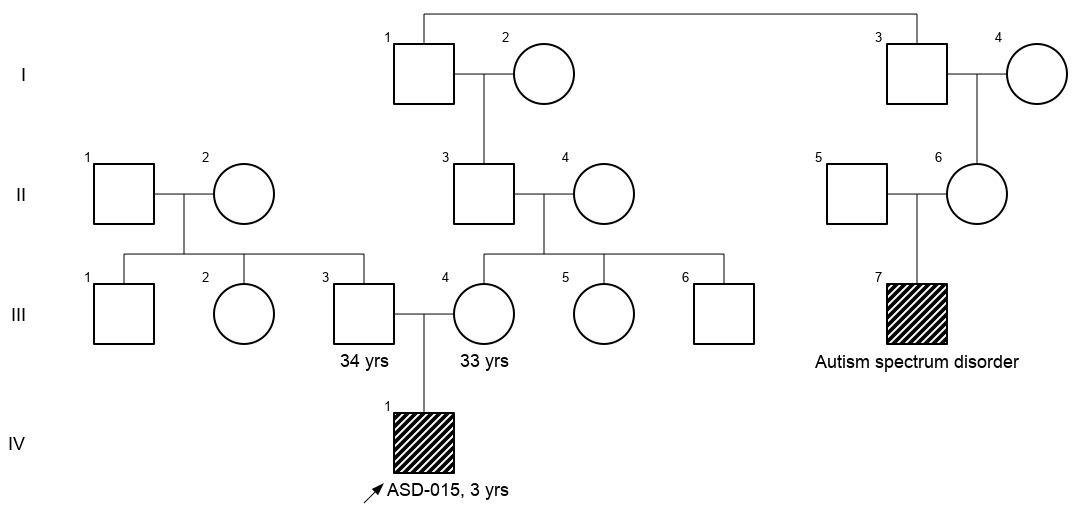 | ASD-018  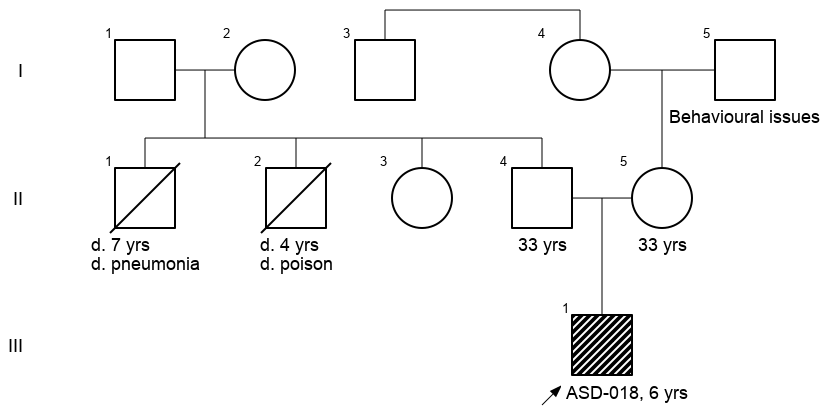 |
| ASD-019  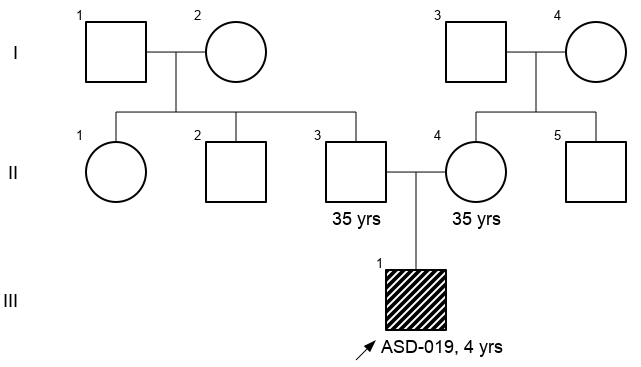 | ASD-023  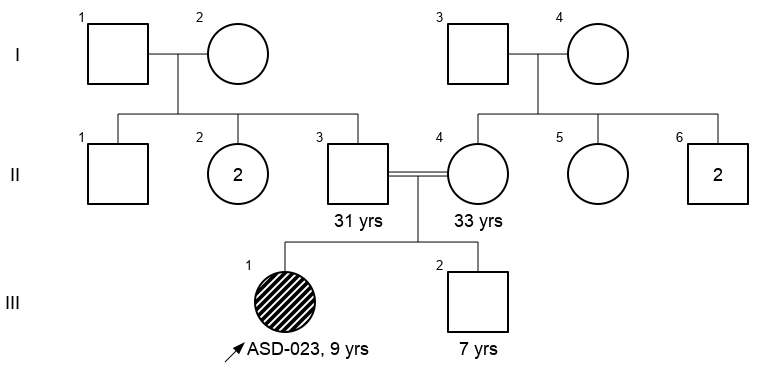 |
| ASD-025  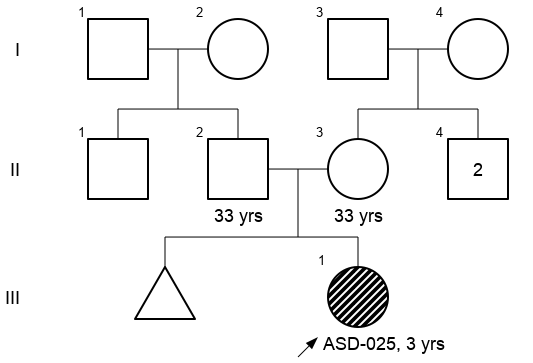 | ASD-026  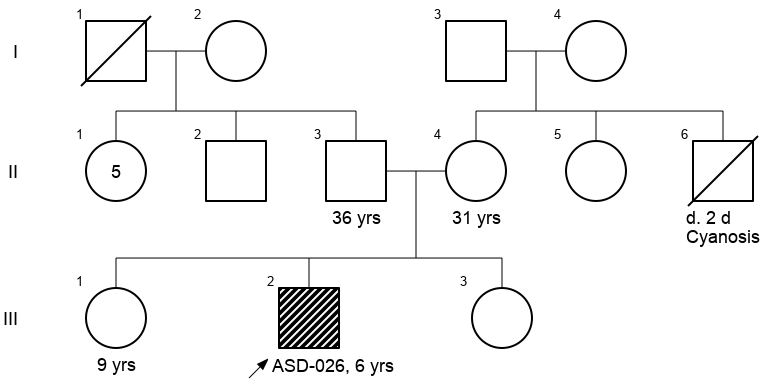 |
| ASD-041  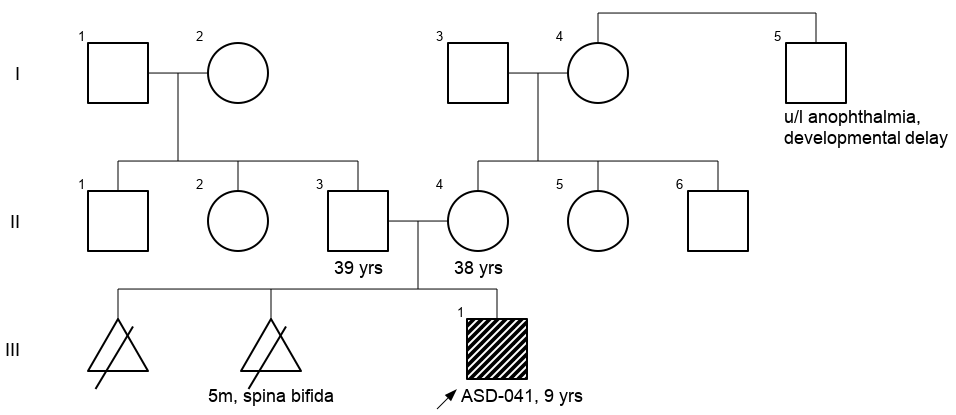 | ASD-042  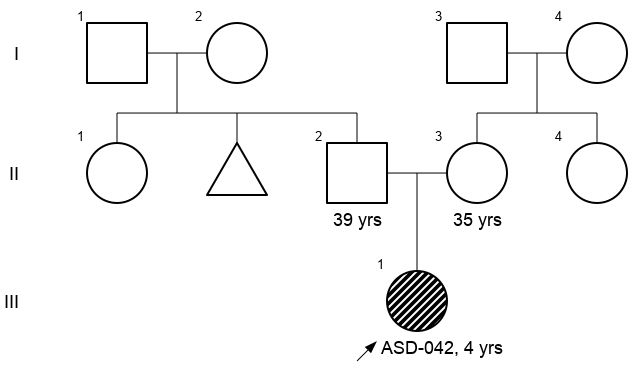 |
| ASD-056  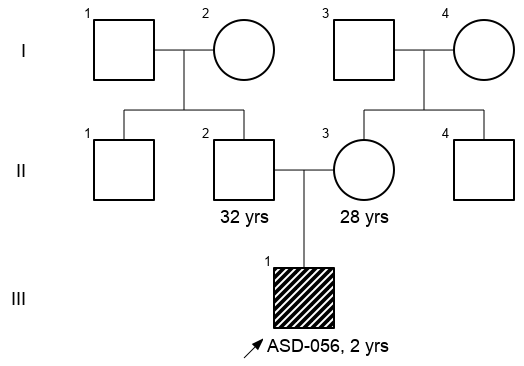 | ASD–059  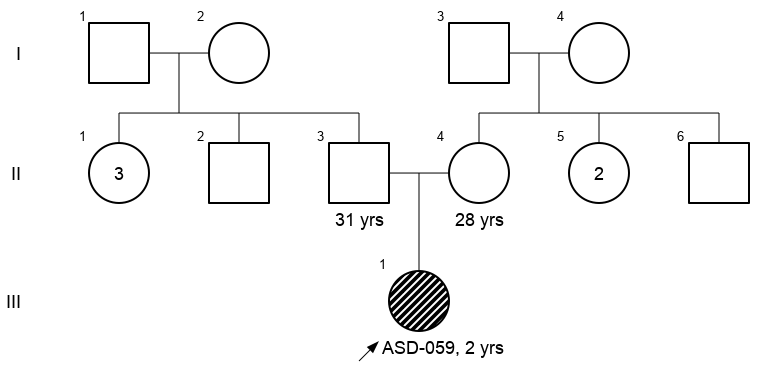 |
| ASD-063  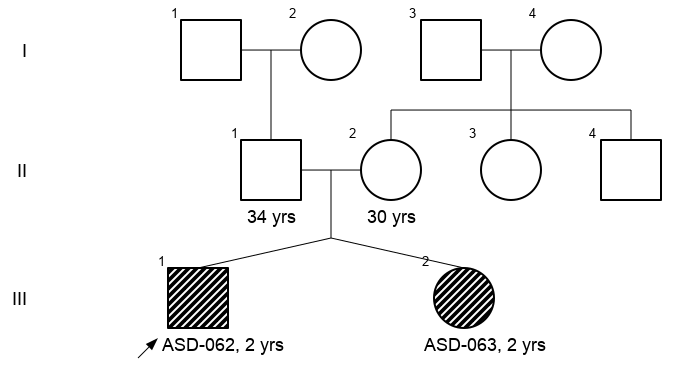 | ASD-068  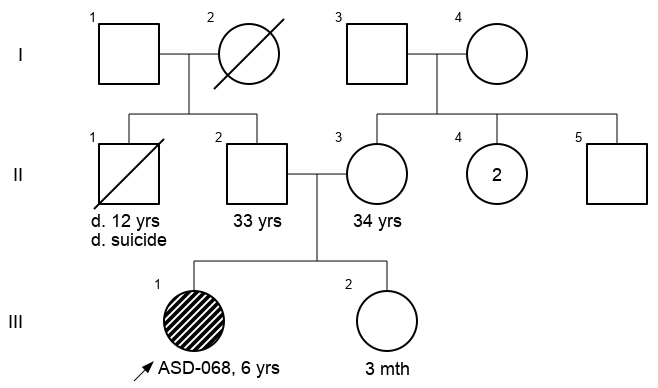 |
| ASD-069  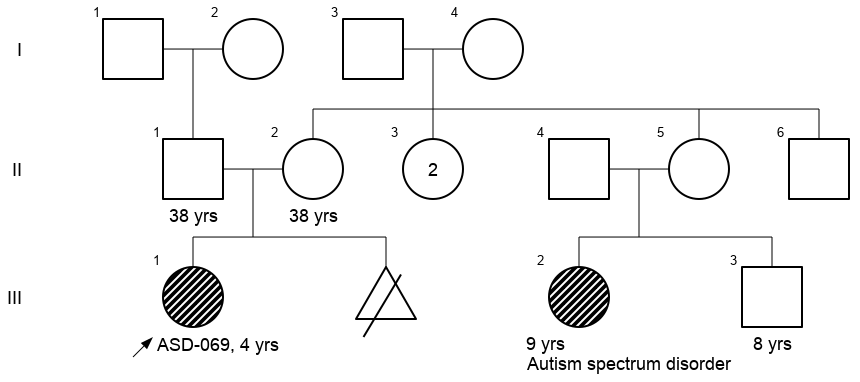 | ASD-070  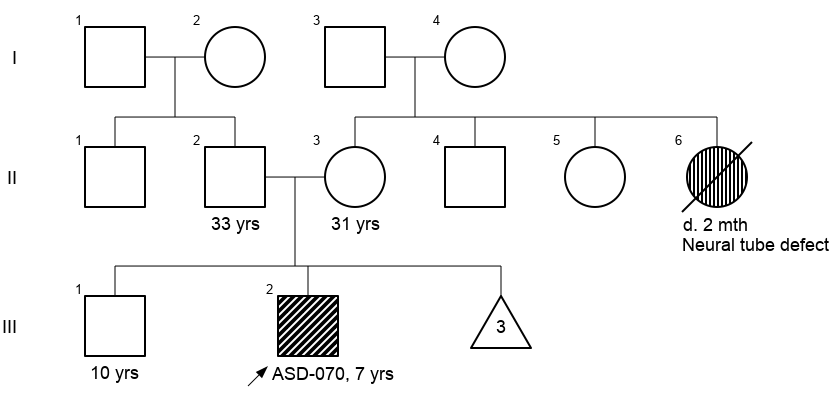 |
| ASD-073  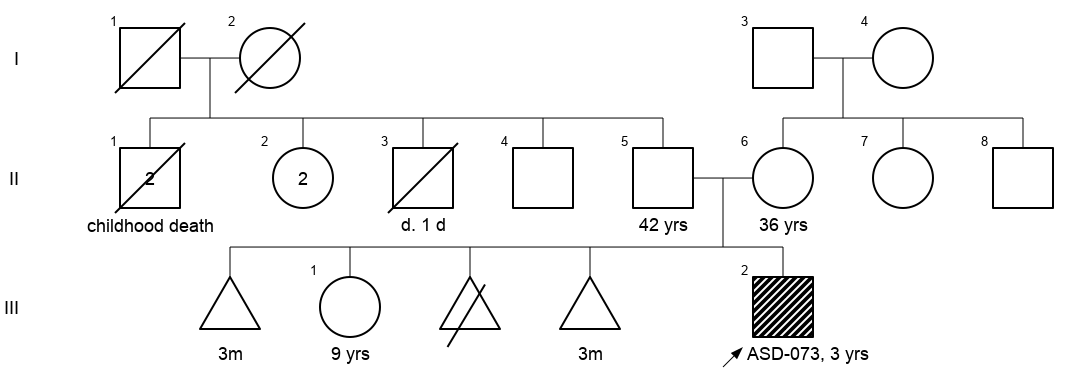 | ASD-083  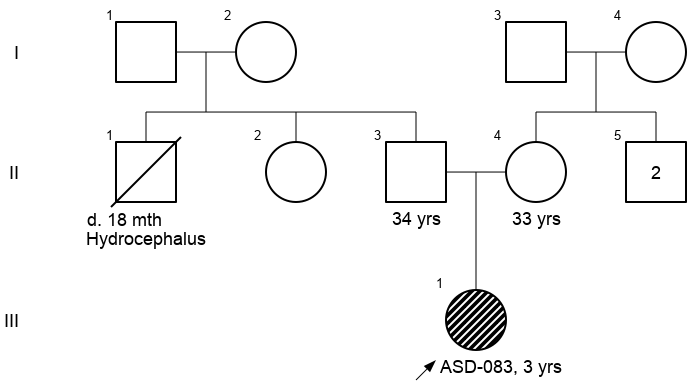 |
| ASD-090  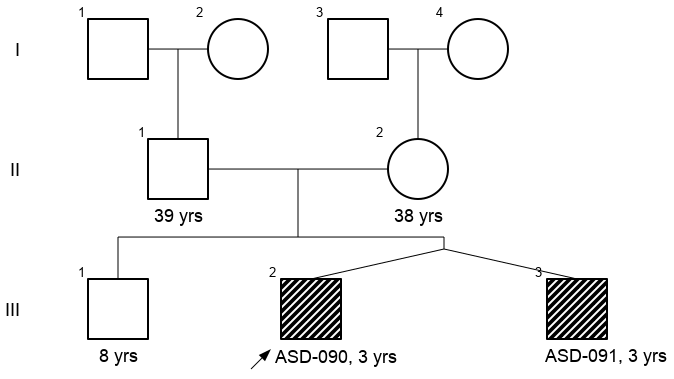 | ASD-096  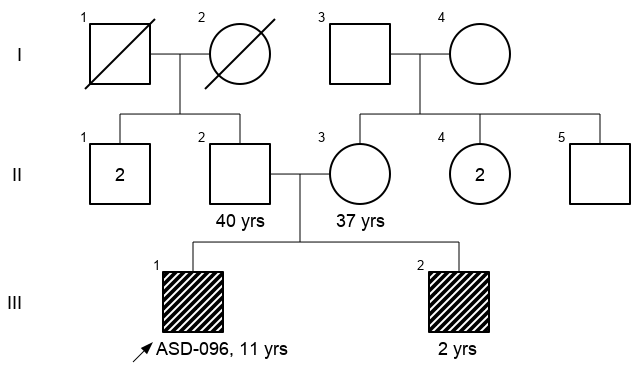 |
| ASD-100  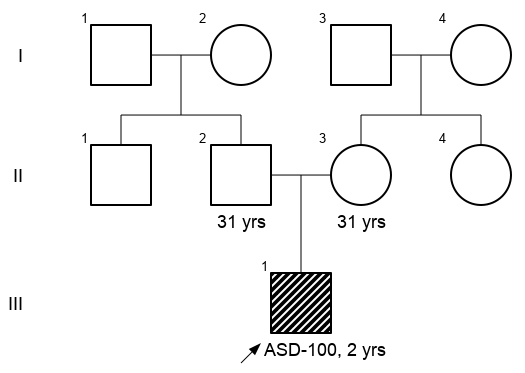 |  |
