# Supplementary material for: Long read whole genome sequencing-based discovery of complex structural variants and their role in aetiology of non-syndromic autism spectrum disorder in India
Source: Research Square preprint supplement (doi:10.21203/rs.3.rs-5950423/v1), 2025-02-05
Supplement: Supplementary file 7 [file c3fe3171f15598e58c1bdd6a.docx]

**Supplementary File 6: Number of concordant calls and prioritized variants for each SV type for all cases**

| **Case ID** | **Concordant calls (2 callers)** | | | | | **Concordant calls (3 callers)** | | | | | **Concordant calls (4 callers)** | | | | | **Prioritised variants** | | | | | **Candidate variant** |
| --- | --- | --- | --- | --- | --- | --- | --- | --- | --- | --- | --- | --- | --- | --- | --- | --- | --- | --- | --- | --- | --- |
| **Using cuteSV as the basis for selection of concordant variants for del, dup, ins and tra and npInv for inv** | | | | | | | | | | | | | | |
| del | dup | ins | inv | tra | del | dup | Ins | inv | tra | del | dup | ins | inv | tra | del | dup | Ins | inv | tra |  |
| **ASD-063** | 1 | 0 | 1 | 0 | 0 | 0 | 0 | 3 | 0 | 0 | 0 | 0 | 0 | 0 | 0 | none | none | none | none | none | - |
| **ASD-096** | 1 | 0 | 4 | 0 | 0 | 4 | 0 | 12 | 0 | 0 | 0 | 0 | 0 | 0 | 0 | none | none | none | none | none | - |
| **ASD-090** | 2 | 0 | 6 | 0 | 0 | 13 | 0 | 29 | 1 | 0 | 0 | 0 | 0 | 0 | 0 | none | none | none | 1 | none | 20_10183741_12846281_INV_1 |
| **ASD-023** | 8 | 0 | 30 | 2 | 0 | 35 | 0 | 168 | 0 | 0 | 0 | 0 | 1 | 0 | 0 | none | none | none | none | none | - |
| **ASD-083** | 0 | 0 | 2 | 2 | 0 | 3 | 0 | 9 | 0 | 0 | 0 | 0 | 0 | 0 | 0 | none | none | none | none | none | - |
| **ASD-042** | 3 | 0 | 18 | 1 | 0 | 15 | 0 | 73 | 0 | 0 | 0 | 0 | 0 | 0 | 0 | none | none | none | none | none | - |
| **ASD-002** | 4 | 0 | 0 | 1 | 1 | 26 | 0 | 133 | 0 | 0 | 0 | 0 | 2 | 0 | 0 | none | none | none | none | none | - |
| **ASD-012** | 11 | 1 | 69 | 0 | 0 | 64 | 0 | 247 | 0 | 1 | 0 | 0 | 1 | 0 | 0 | none | none | none | none | none | - |
| **ASD-015** | 10 | 1 | 40 | 1 | 2 | 40 | 0 | 146 | 0 | 0 | 0 | 0 | 1 | 0 | 0 | none | none | 1 | none | none | - |
| **ASD-018** | 1 | 0 | 6 | 0 | 0 | 8 | 0 | 22 | 0 | 0 | 0 | 0 | 0 | 0 | 0 | none | none | none | none | none | - |
| **ASD-056** | 3 | 0 | 12 | 0 | 0 | 7 | 0 | 53 | 1 | 0 | 0 | 0 | 2 | 0 | 0 | none | none | none | none | none | - |
| **ASD-069** | 4 | 0 | 12 | 2 | 1 | 14 | 1 | 56 | 0 | 0 | 0 | 0 | 0 | 0 | 0 | none | none | none | none | none | - |
| **ASD-100** | 4 | 0 | 27 | 2 | 0 | 32 | 0 | 116 | 0 | 0 | 0 | 0 | 0 | 0 | 0 | 1 | none | none | none | none | - |
| **ASD-073** | 2 | 0 | 3 | 1 | 0 | 2 | 0 | 13 | 0 | 0 | 0 | 0 | 0 | 0 | 0 | none | none | none | none | none | - |
| **ASD-059** | 19 | 2 | 45 | 0 | 1 | 38 | 0 | 255 | 0 | 2 | - | - | - | - | - | none | none | none | none | none | - |
| **ASD-025** | 3 | 2 | 8 | 0 | 2 | 12 | 0 | 41 | 0 | 0 | 0 | 0 | 0 | 0 | 0 | none | none | none | none | none | - |
| **ASD-008** | 12 | 0 | 40 | 0 | 1 | 57 | 0 | 185 | 0 | 2 | 0 | 0 | 1 | 0 | 0 | none | none | none | none | none | - |
| **ASD-019** | 9 | 0 | 32 | 1 | 1 | 37 | 1 | 137 | 0 | 0 | - | - | - | - | - | none | none | none | none | none | - |
| **ASD-004** | 4 | 0 | 21 | 2 | 1 | 27 | 0 | 106 | 0 | 0 | - | - | - | - | - | none | none | none | none | none | - |
| **ASD-070** | 23 | 1 | 70 | 0 | 3 | 97 | 0 | 398 | 0 | 1 | - | - | - | - | - | none | none | none | none | none | - |
| **ASD-041** | 7 | 1 | 65 | 1 | 2 | 58 | 1 | 291 | 0 | 3 | - | - | - | - | - | none | none | none | none | none | - |
| **ASD-068** | 89 | 1 | 389 | 2 | 0 | 3 | 0 | 2 | 0 | 0 | - | - | - | - | - | none | none | 1 | none | none | - |
| **ASD-026** | 9 | 0 | 47 | 2 | 0 | 44 | 0 | 181 | 0 | 1 | 0 | 0 | 1 | 0 | 0 | none | none | none | none | none | - |

SV: structural variant; del: deletion; dup: duplication; ins:insertion; inv: inversion; tra: translocation
